# Supplementary material
Source: MDPI journal article supplement (https://www.mdpi.com/2072-4292/15/20/5069)
Supplement: s1 [file s1]

# Comprehensive Evaluation of Spatial Distribution and Temporal Trend of NO<sub>2</sub> , SO<sub>2</sub> , and AOD based on Satellite Observations over South and East Asia from 2011 to 2021

Md Masudur Rahman<sup>1,2</sup>, Shuo Wang<sup>1\*</sup>, Weixiong Zhao<sup>1</sup>, Arfan Arshad<sup>3</sup>, Weijun Zhang<sup>1</sup>, Cenlin He<sup>4</sup>

<sup>1</sup> Laboratory of Atmospheric Physico-Chemistry, Anhui Institute of Optics and Fine Mechanics, HFIPS, Chinese Academy of Sciences, Hefei 230031, Anhui, China

<sup>2</sup> Department of Electrical and Electronic Engineering, Pabna University of Science and Technology, Pabna-6600, Bangladesh

<sup>3</sup> Biosystems Engineering, Oklahoma State University, Oklahoma, USA

<sup>4</sup> Research Application Laboratory, National Center of Atmospheric Research (NCAR), CO, Boulder, USA

\* Correspondence: wangs@aiofm.ac.cn

**Table S1** Summary of utilized satellite and emission inventory data.

| Data Source/Platform   | Atmospheric Composites | Units                     | Spatial Resolution | Temporal Resolution | Web Link                                                                                                                  |
|------------------------|------------------------|---------------------------|--------------------|---------------------|---------------------------------------------------------------------------------------------------------------------------|
| OMI/Aura               | NO <sub>2</sub>        | Molecules/cm <sup>2</sup> | 0.25° × 0.25°      | Daily               | <a href="https://giovanni.gsfc.nasa.gov/giovanni/">https://giovanni.gsfc.nasa.gov/giovanni/</a><br>(Accessed on May 2022) |
|                        | SO <sub>2</sub>        | Dobson Unit*              | 0.25° × 0.25°      | Daily               |                                                                                                                           |
| MODIS/ Aqua            | AOD at 550 nm          | Unit less                 | 1° × 1°            | Daily               |                                                                                                                           |
| PKU Emission Inventory | NO <sub>x</sub>        | g/km <sup>2</sup> /month  | 0.1° × 0.1°        | Monthly             | <a href="http://inventory.pku.edu.cn/home.html">http://inventory.pku.edu.cn/home.html</a><br>(Accessed on July 2022)      |
|                        | SO <sub>2</sub>        | g/km <sup>2</sup> /month  | 0.1° × 0.1°        | Monthly             |                                                                                                                           |
|                        | PM <sub>2.5</sub>      | g/km <sup>2</sup> /month  | 0.1° × 0.1°        | Monthly             |                                                                                                                           |

\*The Dobson Unit (DU) is converted into Molecules/cm<sup>2</sup> (1 DU = 2.687×10<sup>16</sup> Molecules/cm<sup>2</sup>) for unifying the unit for gaseous air pollutants.

**Table S2** Statistical values of NO<sub>2</sub> hotspots over randomly selected cities in the study area.

| Hotspot Cities | Countries | Lon (Deg.) | Lat (Deg.) | Confidence Level | Overall NO <sub>2</sub> (×10 <sup>15</sup> molec/cm <sup>2</sup> ) | p Values  |
|----------------|-----------|------------|------------|------------------|--------------------------------------------------------------------|-----------|
| Kowloon        | China     | 114.23     | 22.38      | 99%              | 10.11                                                              | 0.0000020 |
| Nanjing        | China     | 118.77     | 32.05      | 99%              | 15.78                                                              | 0.0058396 |
| T'ai-chung     | Taiwan    | 120.67     | 24.14      | 95%              | 4.54                                                               | 0.0302960 |
| Changsha       | China     | 112.97     | 28.20      | 99%              | 7.14                                                               | 0.0000200 |
| Nanchang       | China     | 115.89     | 28.67      | 99%              | 6.58                                                               | 0.0001330 |
| Hangzhou       | China     | 120.17     | 30.25      | 99%              | 14.59                                                              | 0.0000383 |

|            |            |        |       |     |       |           |
|------------|------------|--------|-------|-----|-------|-----------|
| Chengdu    | China      | 104.07 | 30.67 | 99% | 8.43  | 0.0000010 |
| Xian       | China      | 108.88 | 34.27 | 99% | 11.84 | 0.0300137 |
| Luoyang    | China      | 112.36 | 34.67 | 99% | 11.91 | 0.0017900 |
| Zhengzhou  | China      | 113.64 | 34.76 | 99% | 15.98 | 0.0106012 |
| Tianjin    | China      | 117.19 | 39.13 | 99% | 18.32 | 0.0061956 |
| Beijing    | China      | 116.39 | 39.91 | 99% | 17.46 | 0.0020652 |
| Baotou     | China      | 109.98 | 40.65 | 99% | 7.37  | 0.0000110 |
| Seoul      | S. Korea   | 127.01 | 37.54 | 99% | 15.01 | 0.0001200 |
| Dhaka      | Bangladesh | 90.41  | 23.71 | 99% | 6.87  | 0.0000600 |
| Faisalabad | Pakistan   | 73.08  | 31.41 | 95% | 4.18  | 0.0255880 |
| Islamabad  | Pakistan   | 73.06  | 33.72 | 95% | 4.53  | 0.0280660 |
| Amritsar   | India      | 74.87  | 31.63 | 99% | 4.86  | 0.0036090 |
| New Delhi  | India      | 77.21  | 28.56 | 99% | 6.87  | 0.0032000 |
| Calcutta   | India      | 88.33  | 22.54 | 95% | 4.19  | 0.0021000 |

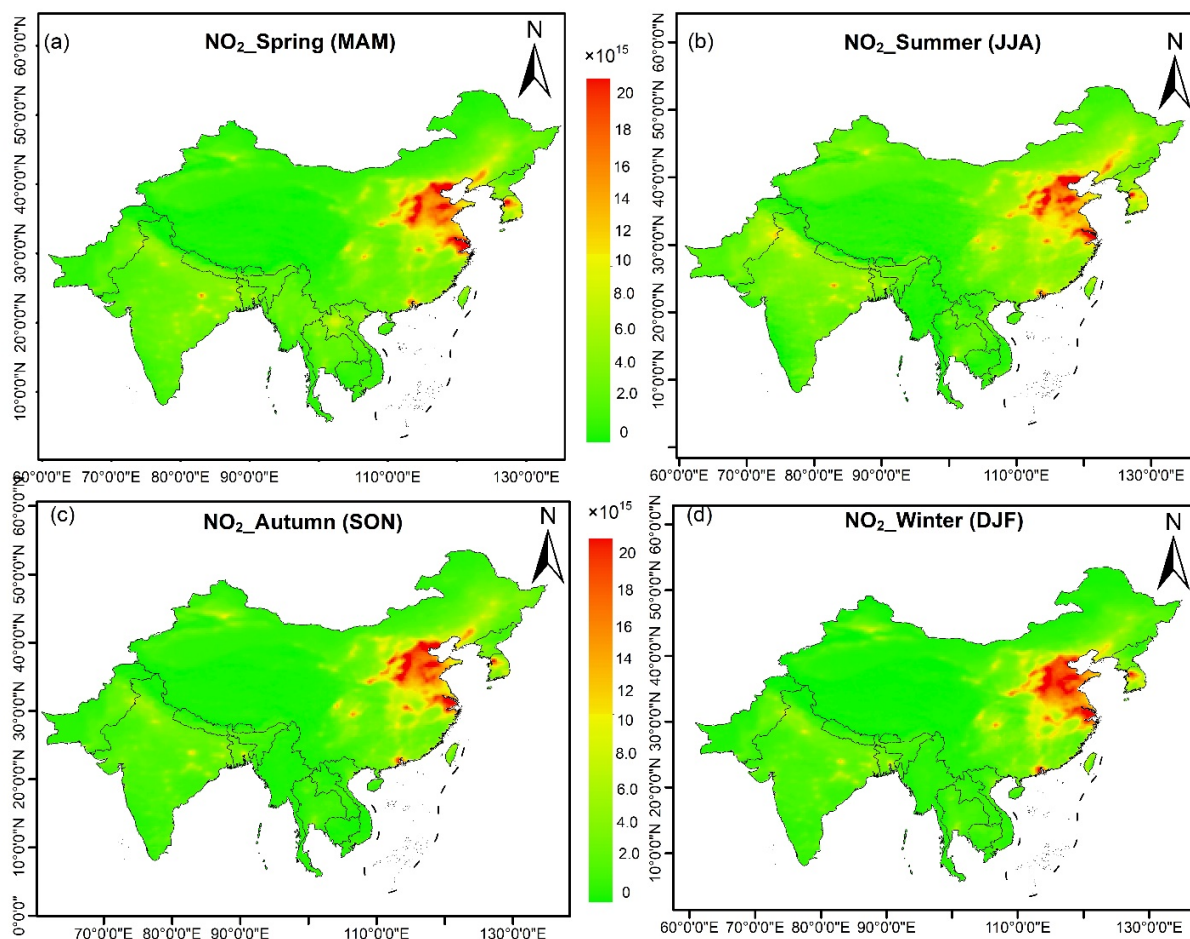

**Figure S1.** Seasonal distribution of NO<sub>2</sub> (in molecules/cm<sup>2</sup>) during the period of 2011 to 2021.

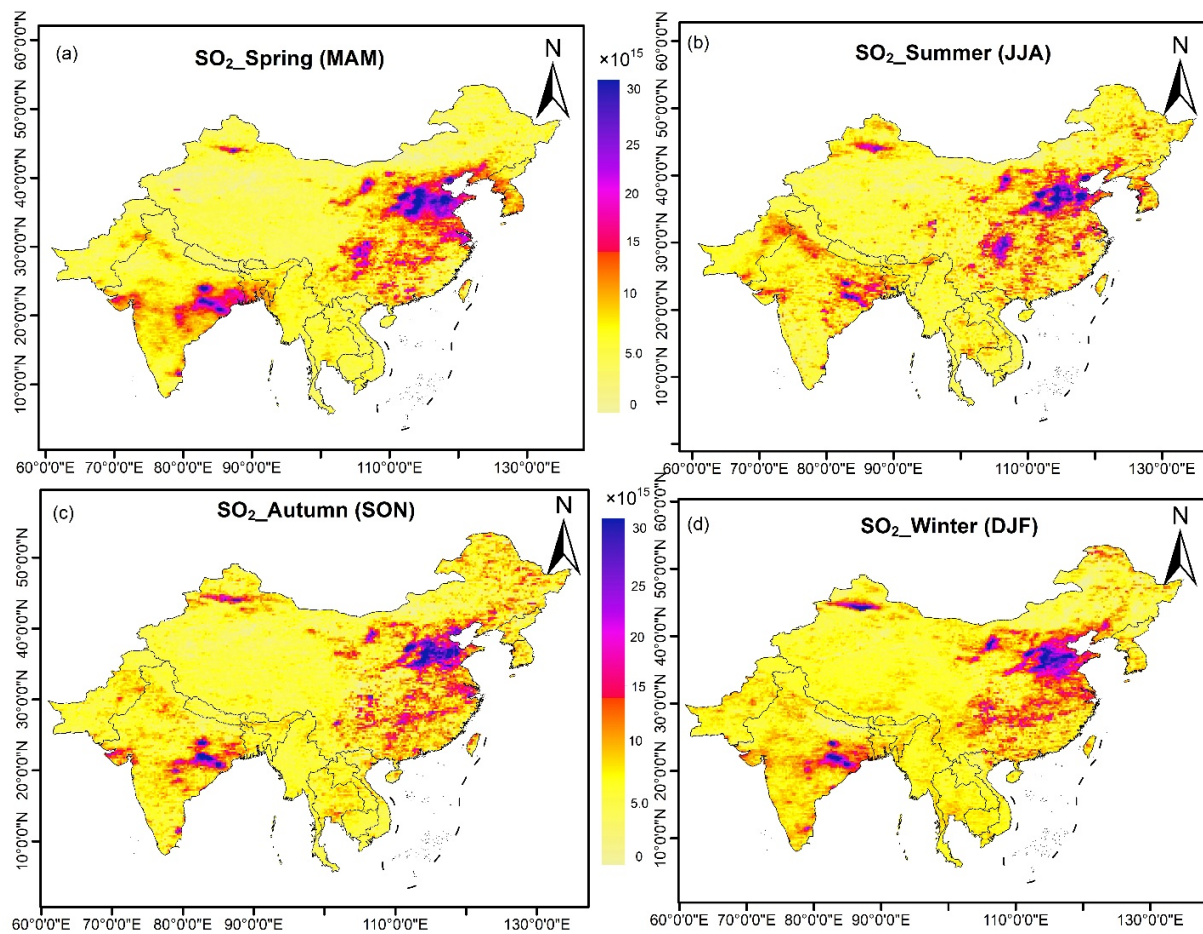

**Figure S2.** Seasonal distribution of SO<sub>2</sub> (in molecules /cm<sup>2</sup>) during the period of 2011 to 2021.

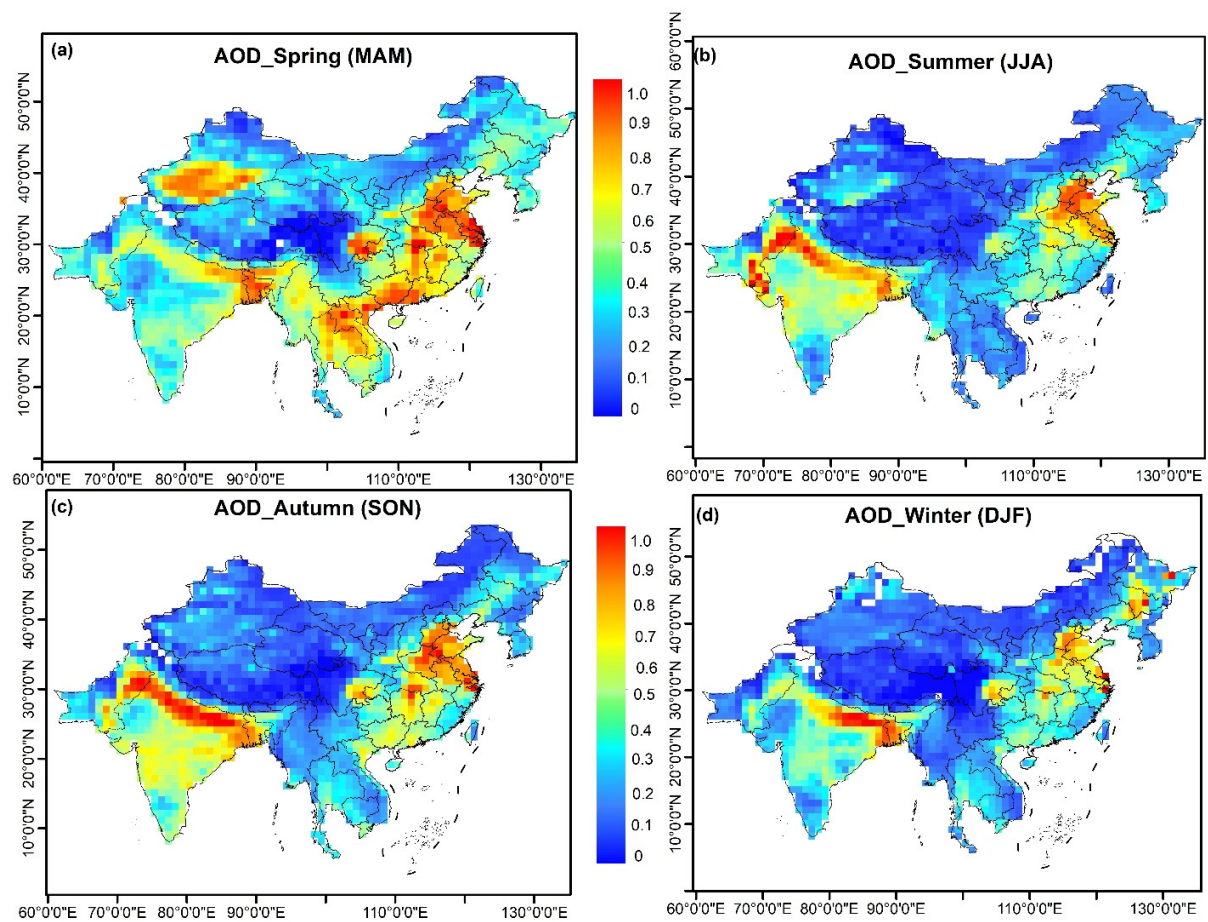

**Figure S3.** Seasonal distribution of AOD (unitless) during the period of 2011 to 2021.



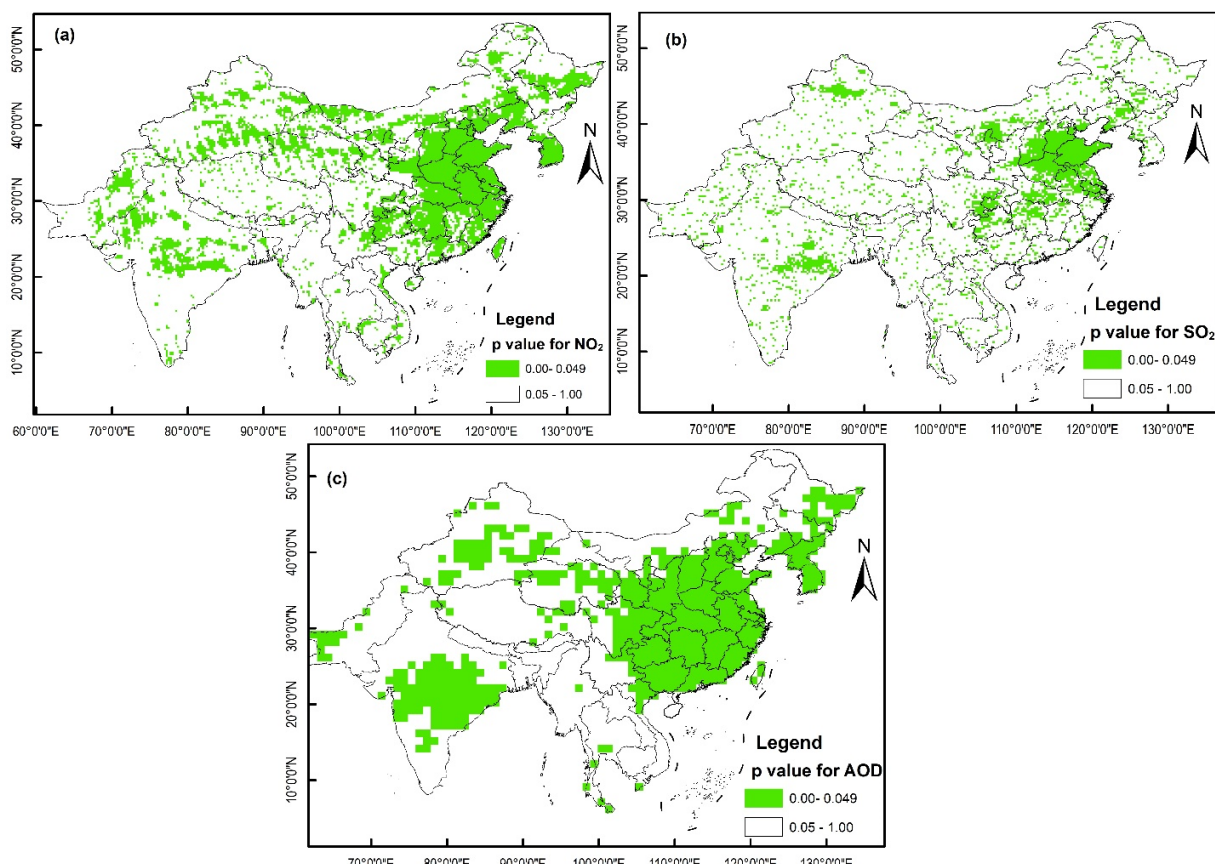

**Figure S4.** Respective P values for the regional distribution of the trend of (a) NO<sub>2</sub> and (b) SO<sub>2</sub>, and (c) AOD.

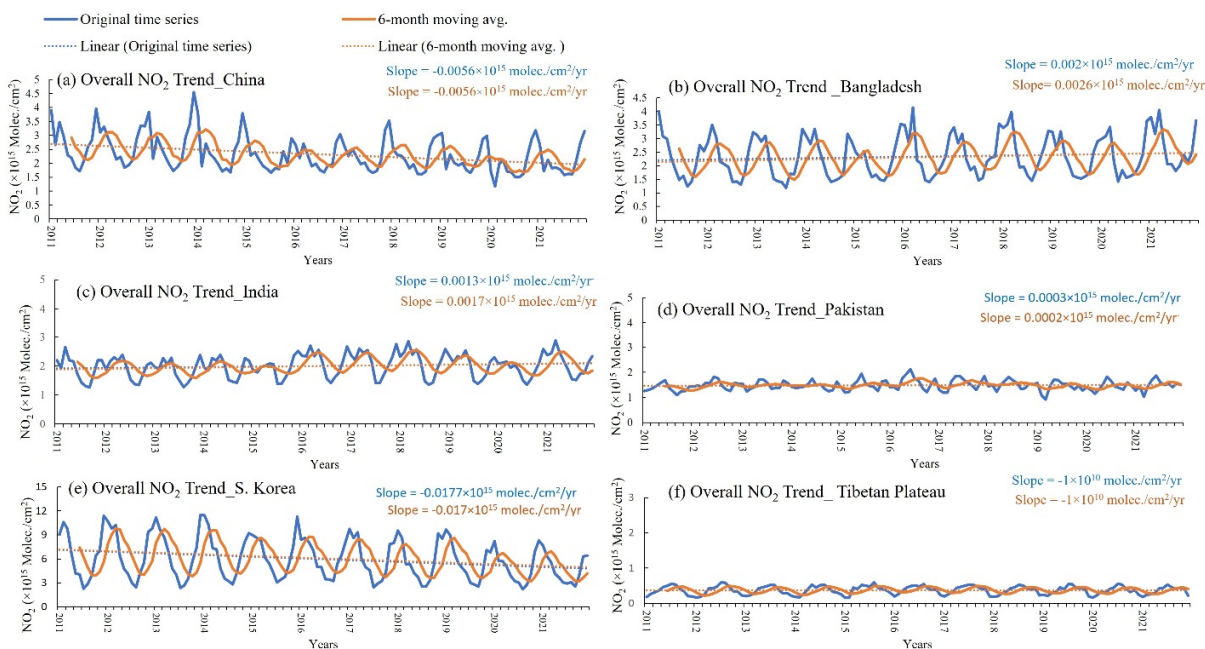

**Figure S5.** The overall trend of NO<sub>2</sub> over (a) China, (b) Bangladesh, (c) India, (d) Pakistan, (e) Republic of Korea, and (f) Tibetan Plateau.

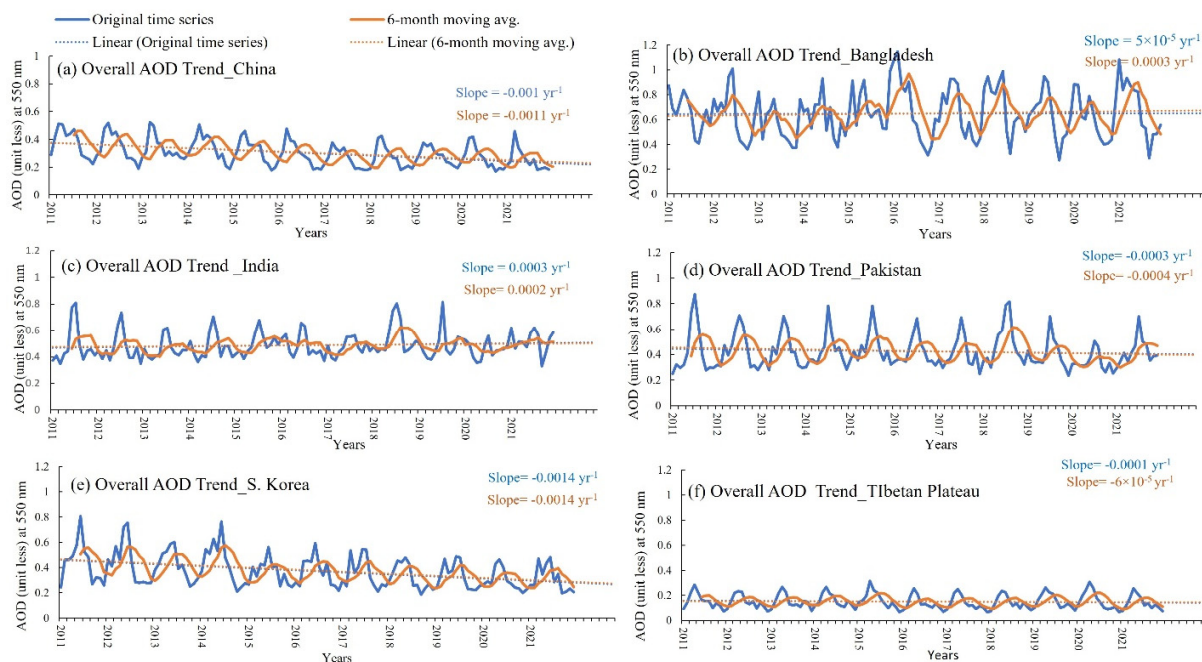

**Figure S6.** The overall trend of AOD over (a) China, (b) Bangladesh, (c) India, (d) Pakistan, (e) Republic of Korea, and (f) Tibetan Plateau.
